# Supplementary material for: Anthropogenic disturbances are key to maintaining the biodiversity of grasslands
Source: PubMed Central journal article supplement (PMC4763272; doi:10.1038/srep22132), 2016-02-23

Supplementary Information for  
**Anthropogenic disturbances are key to maintaining the biodiversity of  
grasslands**

Authors

**Z.Y. Yuan<sup>1, 2</sup>, F. Jiao<sup>1,2\*</sup>, Y.H. Li<sup>3</sup>, Robert L. Kallenbach<sup>4</sup>**

Corresponding to ZYY: [zyyuan@ms.iswc.ac.cn](mailto:zyyuan@ms.iswc.ac.cn)

**The PDF includes:**

Additional captions for Figures 1 to 4

Supplementary Figures 1 to 4

## **Additional captions for Figures 1 to 4**

### **Figure S1**

Relationships between Shannon-Wiener index and disturbance. The relationships are best described by non-linear regression (dark grey lines). Nonlinear patterns are derived by Loess smoothing (grey shade) with 95% confidence intervals.

### **Figure S2**

Relationships between Shannon-Wiener index and disturbance. The relationships are best described by non-linear regression (dark grey lines). Nonlinear patterns are derived by Loess smoothing (grey shade) with 95% confidence intervals.

### **Figure S3**

Relationships between annual plant biomass and disturbance. The relationships are best described by non-linear regression (dark grey lines). Nonlinear patterns are derived by Loess smoothing (grey shade) with 95% confidence intervals.

### **Figure S4**

Relationships between unpalatable plant biomass and disturbance. The relationships are best described by non-linear regression (dark grey lines). Nonlinear patterns are derived by Loess smoothing (grey shade) with 95% confidence intervals.

## Supplementary Figures 1 to 4

Figure S1

Relationships between Shannon-Wiener index and disturbance. The relationships are best described by non-linear regression (dark grey lines). Nonlinear patterns are derived by Loess smoothing (grey shade) with 95% confidence intervals.

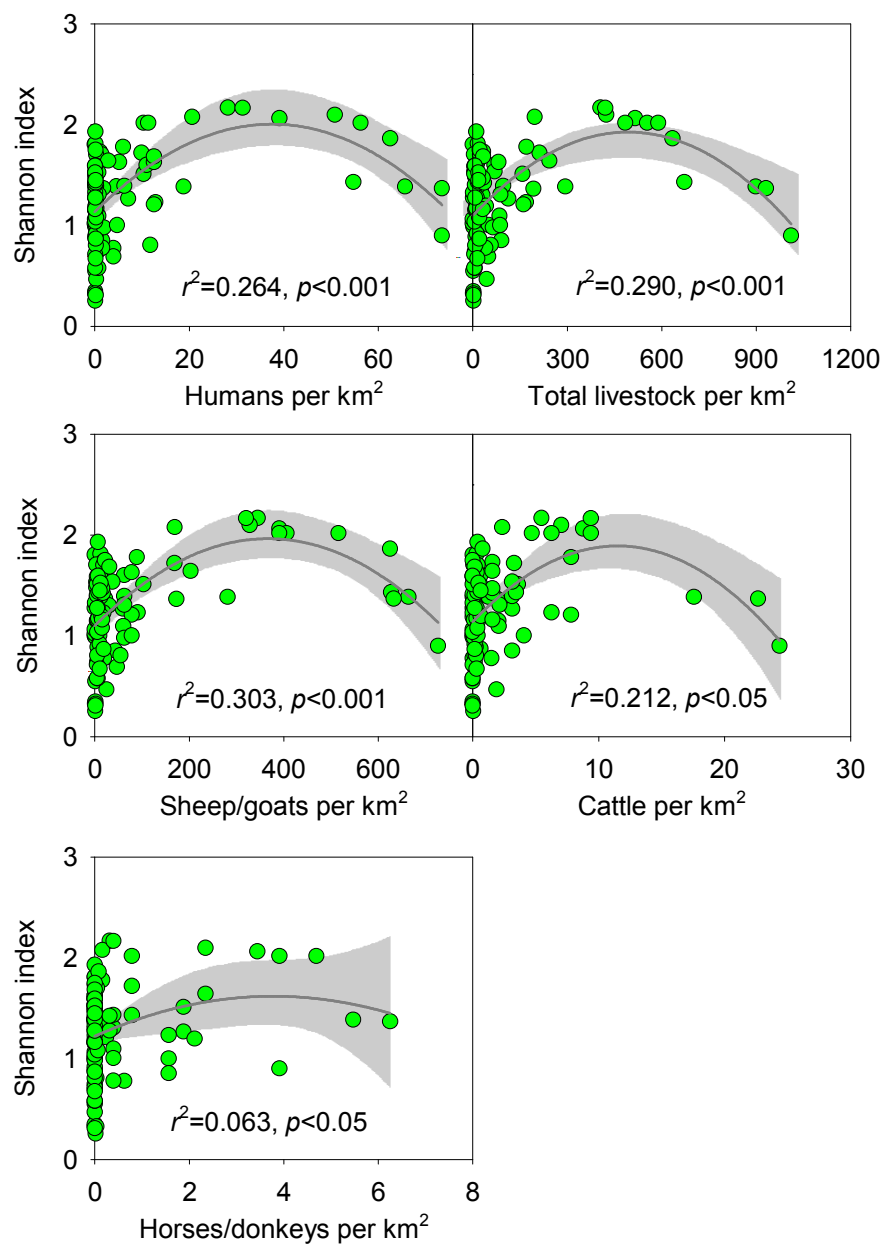

Figure S2

Relationships between Shannon-Wiener index and disturbance. The relationships are best described by non-linear regression (dark grey lines). Nonlinear patterns are derived by Loess smoothing (grey shade) with 95% confidence intervals.

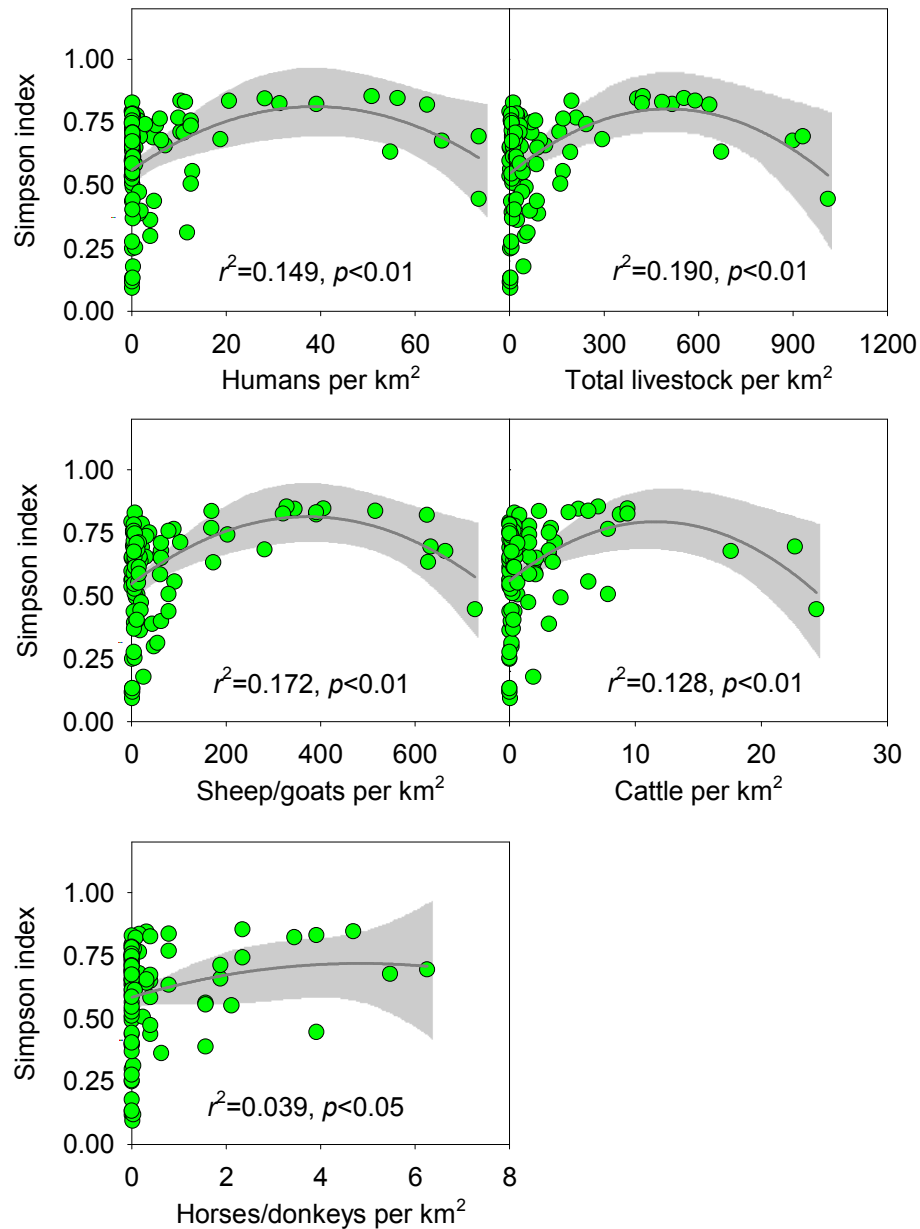

Figure S3

Relationships between annual plant biomass and disturbance. The relationships are best described by non-linear regression (dark grey lines). Nonlinear patterns are derived by Loess smoothing (grey shade) with 95% confidence intervals.

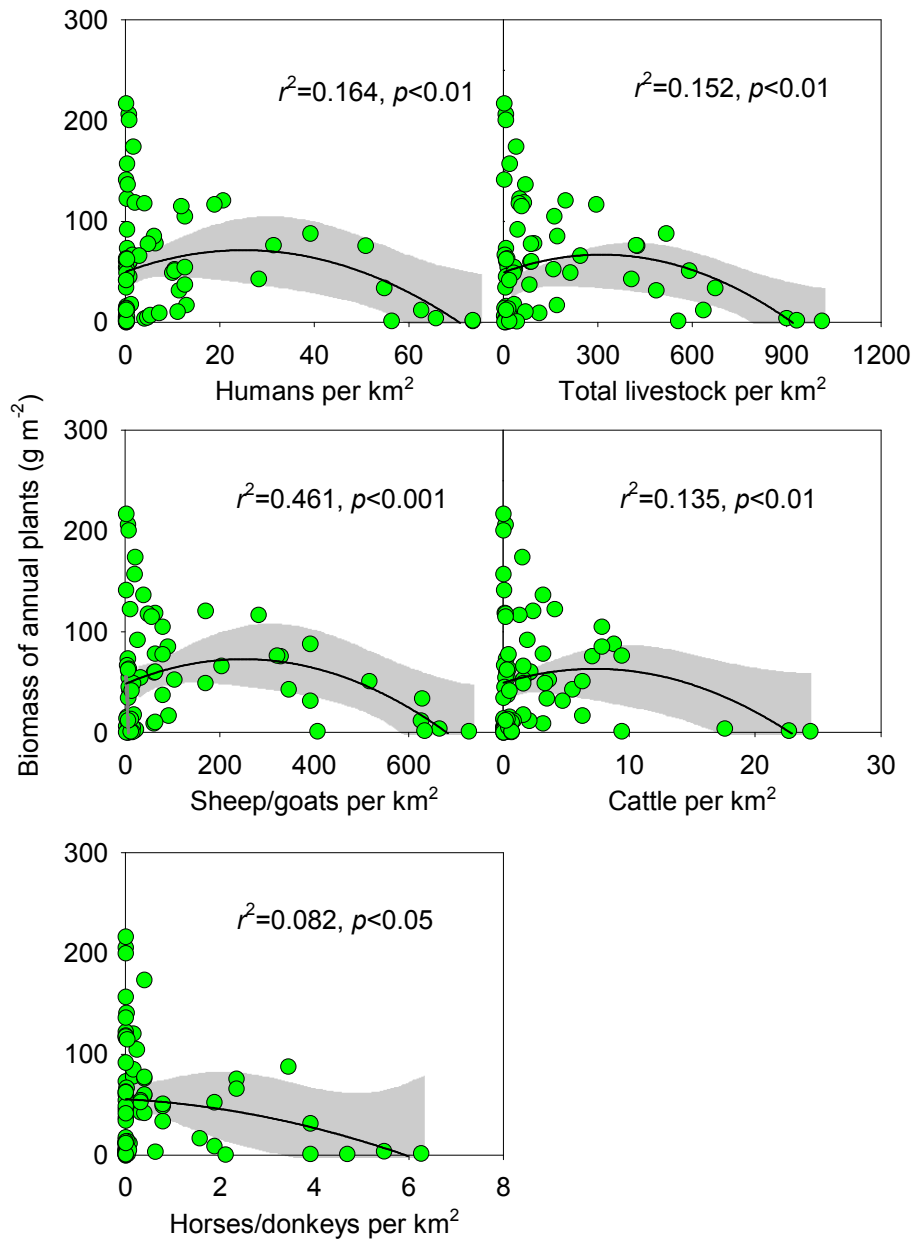

Figure S4

Relationships between unpalatable plant biomass and disturbance. The relationships are best described by non-linear regression (dark grey lines). Nonlinear patterns are derived by Loess smoothing (grey shade) with 95% confidence intervals.

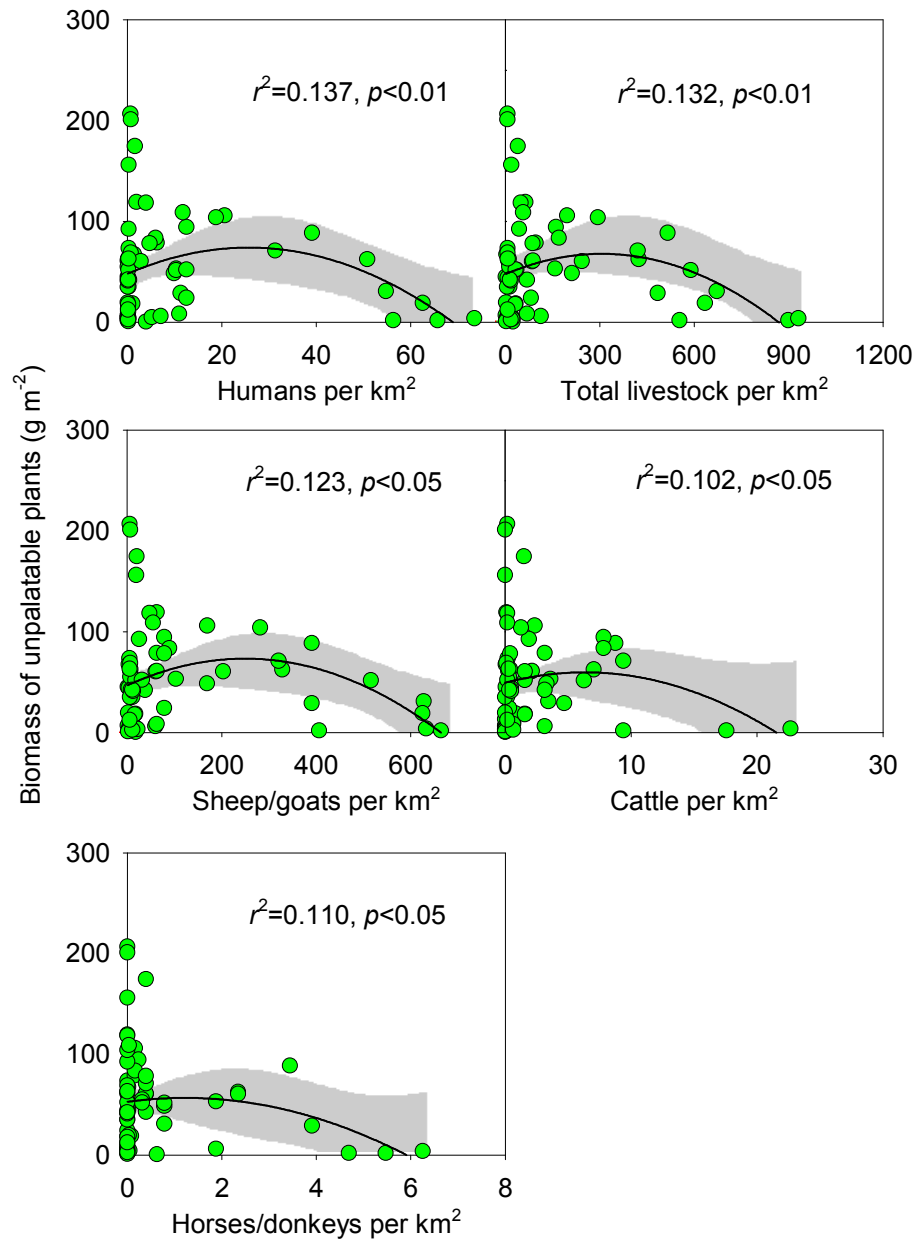

Supplement: srep22132-s1.pdf [file srep22132-s1.pdf]
